# Supplementary material for: Transport properties of polycrystalline SnTe prepared by saturation annealing
Source: Royal Society of Chemistry journal article supplement (doi:10.1039/c9ra10841f), 2020-01-01
Supplement: c9ra10841f1.pdf [file c9ra10841f1.pdf]

## Electronic Supplementary File for

### Transport properties of polycrystalline SnTe prepared by saturation annealing

Dorra Ibrahim<sup>1</sup>, Shantanu Misra<sup>1</sup>, Sylvie Migot<sup>1</sup>, Jaafar Ghanbaja<sup>1</sup>, Anne Dauscher<sup>1</sup>, Bernard Malaman<sup>1</sup>, Christopher Semprimoschnig<sup>2</sup>, Christophe Candolfi<sup>1,\*</sup>, Bertrand Lenoir<sup>1,\*</sup>

<sup>1</sup> *Institut Jean Lamour, UMR 7198 CNRS – Université de Lorraine, 2 allée André Guinier-Campus ARTEM, BP 50840, 54011 Nancy Cedex, France*

<sup>2</sup> *European Space Agency, ESTEC, P.O. Box 299, Keperlaan 1, 2200 AG Noordwijk, The Netherlands*

\*Contact authors: [christophe.candolfi@univ-lorraine.fr](mailto:christophe.candolfi@univ-lorraine.fr); [bertrand.lenoir@univ-lorraine.fr](mailto:bertrand.lenoir@univ-lorraine.fr)

#### Content

- 1). Figure S1 to S3.** Rietveld refinements against the PXRD data for the samples saturation-annealed at 823, 873 and 973 K.
- 2).** Equations for the Debye-Callaway model used to fit the lattice thermal conductivity of the three saturation-annealed samples.

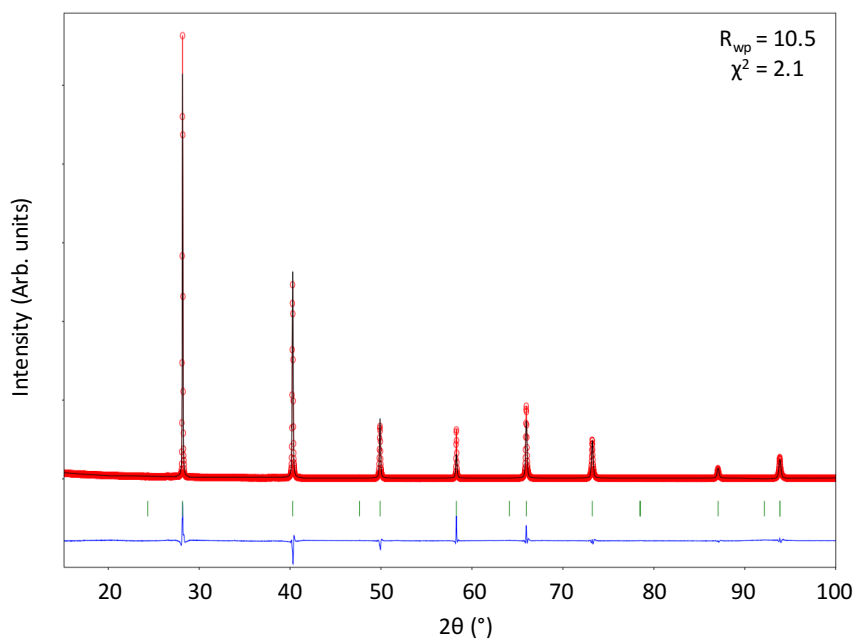

**Figure S1.** Rietveld refinement against the PXRD data collected on the saturation-annealed sample at 823 K. The experimental data are shown in red, the theoretical pattern in black and the difference curve in blue. The vertical green ticks mark the position of the reflections.

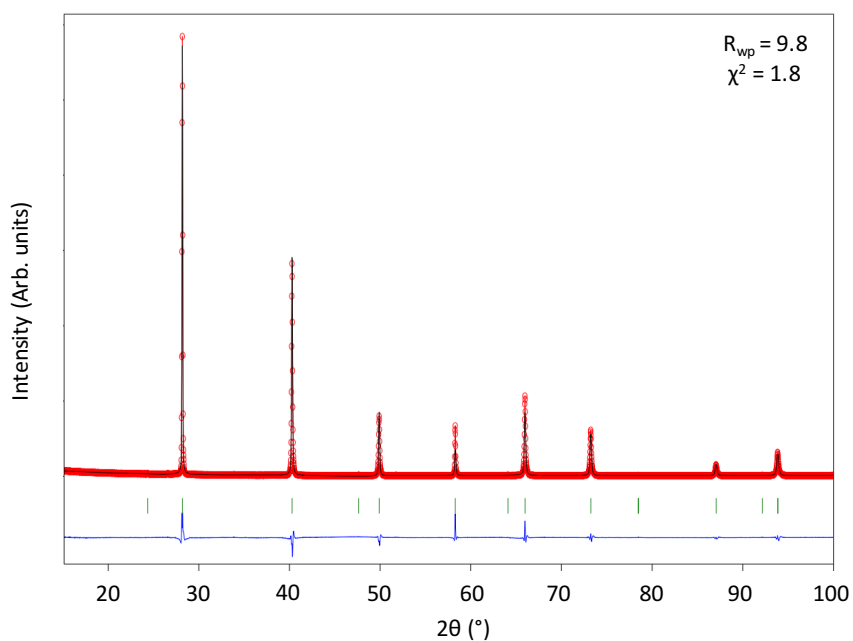

**Figure S2.** Rietveld refinement against the PXRD data collected on the saturation-annealed sample at 873 K. The experimental data are shown in red, the theoretical pattern in black and the difference curve in blue. The vertical green ticks mark the position of the reflections.

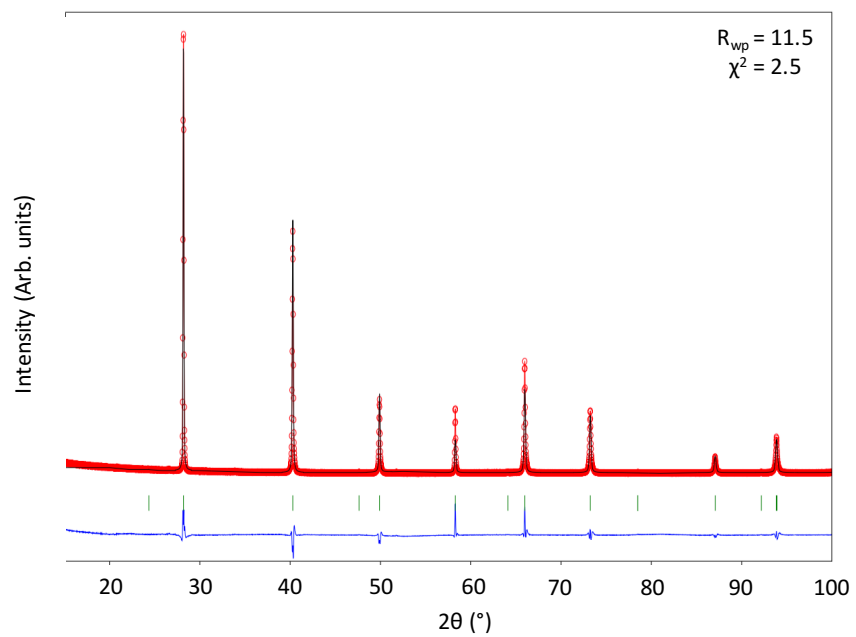

**Figure S3.** Rietveld refinement against the PXRD data collected on the saturation-annealed sample at 973 K. The experimental data are shown in red, the theoretical pattern in black and the difference curve in blue. The vertical green ticks mark the position of the reflections.

## Equations for the Debye-Callaway model used to fit the lattice thermal conductivity of the three saturation-annealed samples

The modeling of the lattice thermal conductivity of the  $\text{Sn}_{1+x}\text{Te}$  samples is based on the expression derived from the Debye model in which the normal processes are neglected. Within this model, the lattice thermal conductivity is expressed as:

$$\kappa_r = \frac{k_B}{2\pi^2 v} \left(\frac{k_B}{\hbar}\right)^3 T^3 \int_0^{\theta_D/T} \tau(x, T) \frac{x^4 e^x}{(e^x - 1)^2} dx$$

where  $\tau(x, T)$  is the total relaxation time of phonons,  $x = \hbar\omega/k_B T$  is a dimensionless parameter,  $\theta_D$  is the Debye temperature and  $\omega$  is the phonon pulsation. Following the Matthiessen's rule, the expression for  $\tau(x, T)$  can be written as:

$$\tau^{-1} = \frac{v}{L} + A\omega^4 + B\omega^2 T e^{-\theta_D/3T}$$

where  $L$  is the average grain size and  $A$  and  $B$  are adjustable parameters. The first term corresponds to the grain boundary scattering, the second term reflects point-defect scattering and the last term represents phonon-phonon scattering via Umklapp processes.
